# Supplementary material for: Synthesis and Characterization of Ion Pairs between Alkaline Metal Ions and Anionic Anti-Aromatic and Aromatic Hydrocarbons with π-Conjugated Central Seven- and Eight-Membered Rings
Source: PubMed Central journal article supplement (PMC7594067; doi:10.3390/molecules25204742), 2020-10-15
Supplement: molecules-25-04742-s001.pdf [file molecules-25-04742-s001.pdf]

## Supporting Information

# Synthesis and Characterization of Ion Pairs between Alkaline Metal Ions and Anionic Anti-Aromatic and Aromatic Hydrocarbons with $\pi$ -Conjugated Central Seven- and Eight-Membered Rings

Jan Bloch <sup>1</sup>, Stefan Kradolfer <sup>1</sup>, Thomas L. Gianetti <sup>2</sup>, Detlev Ostendorf <sup>1</sup>, Subal Dey <sup>1</sup>, Victor Mougel <sup>1</sup> and Hansjörg Grützmacher <sup>1,\*</sup>

- <sup>1</sup> Department of Chemistry and Applied Biosciences, ETH Zürich, 8093 Zürich, Switzerland; bloch@inorg.chem.ethz.ch (J.B.); krastefa@inorg.chem.ethz.ch (S.K.); detos@gmx.de (D.O.); deys@ethz.ch (S.D.); mougel@inorg.chem.ethz.ch (V.M.)
- <sup>2</sup> Department of Chemistry & Biochemistry, 1306 E. University Blvd., Tucson, AZ 85719, USA; tgianetti@email.arizona.edu
- \* Correspondence: hgruetzmacher@ethz.ch

### 1. DFT-Calculations

All structures and spectra were calculated using the Gaussian09 suite of programs [1].

Geometry optimizations were performed using the PBE density functional [2, 3] and verified by vibrational analysis. The influence of the solvent was taken in consideration as polarizable continuum solvent model. The basis set 6-311+g(df,pd) [4] was used for optimization and frequency calculations. The UV/Vis spectra were computed with TD-DFT using the same method and basis set as for the geometry optimizations.

Optimized X,Y,Z Cartesian coordinates [Å] used for NICS and UV/Vis calculations

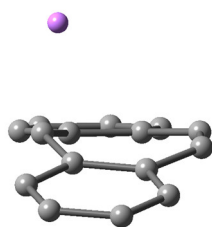

**Litrop**

|   |           |           |           |
|---|-----------|-----------|-----------|
| C | -1.353416 | -1.840325 | -1.653584 |
| C | -0.006107 | -1.894405 | -1.802844 |
| C | 1.023695  | -0.85422  | -1.72643  |
| C | -2.256169 | -0.723787 | -1.360661 |
| C | 0.799823  | 0.438051  | -1.137521 |
| C | -1.805293 | 0.54406   | -0.851084 |
| C | -0.435684 | 0.888871  | -0.528727 |
| H | -1.877808 | -2.788509 | -1.823726 |
| H | 0.391633  | -2.879431 | -2.075564 |
| H | -0.35511  | 1.927597  | -0.176332 |
| C | 1.921832  | 1.313144  | -1.112823 |
| H | 1.783302  | 2.308926  | -0.680603 |
| C | 2.296743  | -1.186079 | -2.219005 |

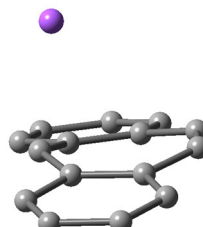

**Natrop**

|   |           |           |           |
|---|-----------|-----------|-----------|
| C | -1.886485 | 0.250798  | -0.678542 |
| C | -1.886485 | 0.250798  | 0.678542  |
| C | -0.847717 | -0.082692 | 1.657752  |
| C | -0.847717 | -0.082692 | -1.657752 |
| C | 0.54219   | -0.24851  | 1.313688  |
| C | 0.54219   | -0.24851  | -1.313688 |
| C | 1.117214  | -0.113729 | 0         |
| H | -2.846616 | 0.511293  | -1.140606 |
| H | -2.846616 | 0.511293  | 1.140606  |
| H | 2.199987  | -0.297627 | 0         |
| C | 1.418592  | -0.529734 | 2.403865  |
| H | 2.480459  | -0.67099  | 2.18017   |

|    |           |           |           |
|----|-----------|-----------|-----------|
| H  | 2.433038  | -2.182466 | -2.6513   |
| C  | 3.384761  | -0.303761 | -2.17282  |
| H  | 4.359255  | -0.596577 | -2.566886 |
| C  | 3.1788    | 0.957793  | -1.604975 |
| H  | 3.999863  | 1.677707  | -1.548166 |
| C  | -3.629586 | -0.952332 | -1.548171 |
| H  | -3.936369 | -1.932278 | -1.927503 |
| C  | -2.823635 | 1.503156  | -0.582582 |
| H  | -2.515014 | 2.482208  | -0.203258 |
| C  | -4.18249  | 1.248631  | -0.772603 |
| H  | -4.911626 | 2.029059  | -0.538156 |
| C  | -4.608121 | 0.009991  | -1.264448 |
| H  | -5.666185 | -0.204996 | -1.422155 |
| Li | -0.409333 | -0.161328 | 1.416072  |

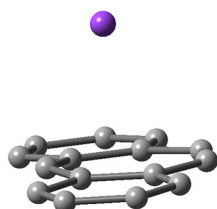**Ktrop**

|   |           |          |           |
|---|-----------|----------|-----------|
| C | -1.764775 | 0.601534 | 0.67895   |
| C | -1.764775 | 0.601534 | -0.67895  |
| C | -0.684057 | 0.507293 | -1.667982 |
| C | -0.684057 | 0.507293 | 1.667982  |
| C | 0.708803  | 0.34234  | -1.316363 |
| C | 0.708803  | 0.34234  | 1.316363  |
| C | 1.252192  | 0.205216 | 0         |
| H | -2.755957 | 0.699985 | 1.137352  |
| H | -2.755957 | 0.699985 | -1.137352 |
| H | 2.341621  | 0.082058 | 0         |
| C | 1.612848  | 0.270406 | -2.42256  |
| H | 2.677769  | 0.155122 | -2.199807 |
| C | -1.062943 | 0.579147 | -3.017958 |
| H | -2.127418 | 0.707616 | -3.239395 |
| C | -0.147474 | 0.501428 | -4.078327 |
| H | -0.481594 | 0.565369 | -5.114714 |
| C | 1.205855  | 0.345979 | -3.752934 |
| H | 1.958382  | 0.285717 | -4.544241 |
| C | -1.062943 | 0.579147 | 3.017958  |
| H | -2.127418 | 0.707616 | 3.239395  |
| C | 1.612848  | 0.270406 | 2.42256   |

|    |           |           |           |
|----|-----------|-----------|-----------|
| C  | -1.253503 | -0.190802 | 2.997251  |
| H  | -2.316221 | -0.050043 | 3.219537  |
| C  | -0.363866 | -0.462442 | 4.047486  |
| H  | -0.718706 | -0.54034  | 5.076276  |
| C  | 0.988316  | -0.627817 | 3.726919  |
| H  | 1.71867   | -0.841808 | 4.512288  |
| C  | -1.253503 | -0.190802 | -2.997251 |
| H  | -2.316221 | -0.050043 | -3.219537 |
| C  | 1.418592  | -0.529734 | -2.403865 |
| H  | 2.480459  | -0.67099  | -2.18017  |
| C  | 0.988316  | -0.627817 | -3.726919 |
| H  | 1.71867   | -0.841808 | -4.512288 |
| C  | -0.363866 | -0.462442 | -4.047486 |
| H  | -0.718706 | -0.54034  | -5.076276 |
| Na | 1.026476  | 2.441652  | 0         |

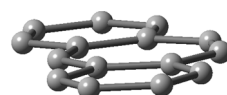**trop-**

|   |           |           |           |
|---|-----------|-----------|-----------|
| C | -1.838655 | -0.000184 | -0.678138 |
| C | -1.838655 | -0.000184 | 0.678138  |
| C | -0.756293 | -0.000108 | 1.666433  |
| C | -0.756293 | -0.000108 | -1.666433 |
| C | 0.64679   | -0.000202 | 1.312323  |
| C | 0.64679   | -0.000202 | -1.312323 |
| C | 1.199717  | -0.000296 | 0         |
| H | -2.835377 | -0.000178 | -1.137303 |
| H | -2.835377 | -0.000178 | 1.137303  |
| H | 2.297052  | -0.000273 | 0         |
| C | 1.553269  | -0.000046 | 2.421838  |
| H | 2.624861  | -0.00006  | 2.198797  |
| C | -1.13824  | 0.000109  | 3.014958  |
| H | -2.21117  | 0.000269  | 3.236223  |
| C | -0.219883 | 0.000278  | 4.080607  |
| H | -0.559919 | 0.000584  | 5.117517  |
| C | 1.142255  | 0.000164  | 3.753429  |
| H | 1.898468  | 0.000336  | 4.544503  |
| C | -1.13824  | 0.000109  | -3.014958 |
| H | -2.21117  | 0.000269  | -3.236223 |
| C | 1.553269  | -0.000046 | -2.421838 |
| H | 2.624861  | -0.00006  | -2.198797 |
| C | 1.142255  | 0.000164  | -3.753429 |

|   |           |          |          |   |           |          |           |
|---|-----------|----------|----------|---|-----------|----------|-----------|
| H | 2.677769  | 0.155122 | 2.199807 | H | 1.898468  | 0.000336 | -4.544503 |
| C | 1.205855  | 0.345979 | 3.752934 | C | -0.219883 | 0.000278 | -4.080607 |
| H | 1.958382  | 0.285717 | 4.544241 | H | -0.559919 | 0.000584 | -5.117517 |
| C | -0.147474 | 0.501428 | 4.078327 |   |           |          |           |
| H | -0.481594 | 0.565369 | 5.114714 |   |           |          |           |
| K | -0.358749 | -2.3115  | 0        |   |           |          |           |

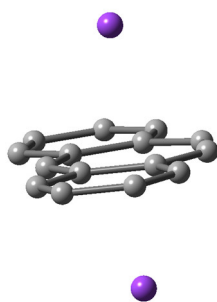**K2trop**

|   |           |           |           |
|---|-----------|-----------|-----------|
| C | -0.000491 | -1.755354 | 0.702334  |
| C | -0.000491 | -1.755354 | -0.702334 |
| C | -0.000093 | -0.687601 | -1.676382 |
| C | -0.000093 | -0.687601 | 1.676382  |
| C | -0.000009 | 0.740166  | -1.327649 |
| C | -0.000009 | 0.740166  | 1.327649  |
| C | -0.000142 | 1.291399  | 0         |
| H | -0.000477 | -2.755966 | 1.151947  |
| H | -0.000477 | -2.755966 | -1.151947 |
| H | 0.000428  | 2.3893    | 0         |
| C | 0.000172  | 1.651203  | -2.429509 |
| H | 0.000126  | 2.72093   | -2.191095 |
| C | 0.000198  | -1.038934 | -3.054959 |
| H | 0.000212  | -2.108784 | -3.29474  |
| C | 0.000456  | -0.11153  | -4.096575 |
| H | 0.000741  | -0.444878 | -5.13683  |
| C | 0.0004    | 1.263146  | -3.768978 |
| H | 0.000488  | 2.023989  | -4.554145 |
| C | 0.000198  | -1.038934 | 3.054959  |
| H | 0.000212  | -2.108784 | 3.29474   |
| C | 0.000172  | 1.651203  | 2.429509  |
| H | 0.000126  | 2.72093   | 2.191095  |
| C | 0.0004    | 1.263146  | 3.768978  |
| H | 0.000488  | 2.023989  | 4.554145  |
| C | 0.000456  | -0.11153  | 4.096575  |
| H | 0.000741  | -0.444878 | 5.13683   |
| K | 2.563127  | -0.256595 | 0         |
| K | -2.56362  | -0.256113 | 0         |

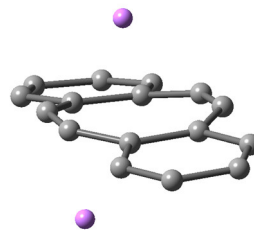**Li2dbcot**

|    |           |           |           |
|----|-----------|-----------|-----------|
| C  | 1.837433  | -0.707757 | 0.062148  |
| C  | 1.828402  | 0.754987  | 0.050272  |
| C  | -1.791159 | -0.702325 | 0.080154  |
| C  | 0.725652  | 1.651341  | 0.157775  |
| C  | -1.792092 | 0.765523  | -0.020474 |
| C  | -0.68614  | 1.664498  | 0.110553  |
| H  | 1.091472  | 2.682053  | 0.244442  |
| H  | -1.051434 | 2.697739  | 0.150846  |
| C  | 0.743979  | -1.605426 | 0.235636  |
| H  | 1.103267  | -2.632841 | 0.37048   |
| C  | -0.684064 | -1.588961 | 0.293217  |
| H  | -1.05331  | -2.605999 | 0.471075  |
| C  | 3.111204  | 1.404234  | -0.052852 |
| H  | 3.106121  | 2.499498  | -0.049237 |
| C  | 3.128697  | -1.347438 | -0.045221 |
| H  | 3.136971  | -2.442729 | -0.026462 |
| C  | 4.316099  | 0.748748  | -0.163968 |
| H  | 5.247596  | 1.313149  | -0.249392 |
| C  | 4.323137  | -0.676645 | -0.159555 |
| H  | 5.261635  | -1.231107 | -0.236748 |
| C  | -3.086167 | -1.349243 | 0.033324  |
| H  | -3.091232 | -2.440228 | 0.129529  |
| C  | -3.077515 | 1.399653  | -0.195351 |
| H  | -3.073613 | 2.491516  | -0.278461 |
| C  | -4.278503 | -0.691898 | -0.139991 |
| H  | -5.214781 | -1.253396 | -0.181165 |
| C  | -4.275541 | 0.73108   | -0.267206 |
| H  | -5.208187 | 1.28091   | -0.411234 |
| Li | -0.79265  | 0.214749  | 1.913356  |
| Li | 0.020968  | -1.23501  | -1.848167 |

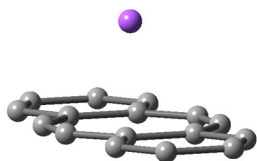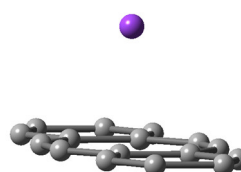**Na<sub>2</sub>dbcot**

|    |           |           |           |
|----|-----------|-----------|-----------|
| C  | -1.819259 | -0.7348   | 0.000629  |
| C  | -1.819136 | 0.734483  | 0.000108  |
| C  | 1.818887  | -0.734722 | -0.000028 |
| C  | -0.710745 | 1.635181  | -0.000412 |
| C  | 1.818992  | 0.734574  | 0.000017  |
| C  | 0.710621  | 1.635291  | -0.00045  |
| H  | -1.072489 | 2.669927  | -0.000678 |
| H  | 1.072253  | 2.670074  | -0.00057  |
| C  | -0.710875 | -1.635479 | 0.000953  |
| H  | -1.072507 | -2.670267 | 0.001285  |
| C  | 0.710473  | -1.635394 | 0.000539  |
| H  | 1.072193  | -2.670152 | 0.000548  |
| C  | -3.113363 | 1.376612  | 0.000329  |
| H  | -3.113655 | 2.471989  | 0.000395  |
| C  | -3.113513 | -1.376824 | 0.000089  |
| H  | -3.113866 | -2.4722   | -0.000048 |
| C  | -4.317365 | 0.713778  | 0.000221  |
| H  | -5.255695 | 1.273399  | 0.000312  |
| C  | -4.317456 | -0.713875 | -0.00015  |
| H  | -5.255851 | -1.273384 | -0.000585 |
| C  | 3.113111  | -1.376853 | -0.001165 |
| H  | 3.113385  | -2.472228 | -0.001894 |
| C  | 3.113278  | 1.376587  | 0.000631  |
| H  | 3.113646  | 2.471962  | 0.001297  |
| C  | 4.317117  | -0.714029 | -0.001064 |
| H  | 5.255444  | -1.273653 | -0.001844 |
| C  | 4.317206  | 0.713628  | 0.00022   |
| H  | 5.255604  | 1.273135  | 0.000725  |
| Na | -0.000665 | 0.000649  | -2.104055 |
| Na | 0.001911  | 0.000482  | 2.103897  |

**K<sub>2</sub>dbcot**

|   |           |           |           |
|---|-----------|-----------|-----------|
| C | 1.810646  | -0.000019 | -0.735314 |
| C | 1.810815  | 0.000381  | 0.735647  |
| C | -1.810316 | -0.000468 | -0.735419 |
| C | 0.70881   | 0.000549  | 1.645476  |
| C | -1.810165 | 0.00014   | 0.735561  |
| C | -0.708087 | 0.000843  | 1.645313  |
| H | 1.076374  | 0.001157  | 2.678765  |
| H | -1.075832 | 0.001264  | 2.678546  |
| C | 0.708583  | -0.000986 | -1.645123 |
| H | 1.076327  | -0.001428 | -2.678353 |
| C | -0.708272 | -0.001268 | -1.645239 |
| H | -1.075917 | -0.001852 | -2.678503 |
| C | 3.107491  | 0.000014  | 1.375278  |
| H | 3.108535  | -0.000219 | 2.470727  |
| C | 3.107276  | 0.000478  | -1.375084 |
| H | 3.10825   | 0.000555  | -2.470535 |
| C | 4.312139  | 0.000174  | 0.713826  |
| H | 5.250185  | -0.000026 | 1.274101  |
| C | 4.312015  | 0.000643  | -0.713795 |
| H | 5.249967  | 0.000996  | -1.274228 |
| C | -3.106995 | -0.000032 | -1.375051 |
| H | -3.108043 | -0.000186 | -2.4705   |
| C | -3.106781 | 0.000421  | 1.375325  |
| H | -3.107746 | 0.000654  | 2.470779  |
| C | -4.311638 | 0.000456  | -0.713598 |
| H | -5.24969  | 0.000774  | -1.27386  |
| C | -4.311513 | 0.000525  | 0.714035  |
| H | -5.249464 | 0.000742  | 1.274468  |
| K | -0.000734 | 2.42897   | -0.000899 |
| K | -0.000687 | -2.429682 | 0.000244  |

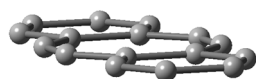**dbcot<sup>2-</sup>**

|   |           |           |           |
|---|-----------|-----------|-----------|
| C | 0.252081  | 0.781852  | -0.561192 |
| C | 1.695365  | 0.607487  | -0.815219 |
| C | 0.757941  | 4.332797  | -0.119367 |
| C | 2.731438  | 1.582385  | -0.83664  |
| C | 2.201224  | 4.158431  | -0.373393 |
| C | 2.928931  | 2.970141  | -0.662639 |
| H | 3.693529  | 1.098052  | -1.061054 |
| H | 3.994343  | 3.209985  | -0.796244 |
| C | -0.475623 | 1.970141  | -0.271935 |
| H | -1.541033 | 1.730294  | -0.138315 |
| C | -0.278131 | 3.357897  | -0.097935 |
| H | -1.240219 | 3.842228  | 0.126494  |
| C | 2.132448  | -0.73861  | -1.083736 |
| H | 3.204954  | -0.869875 | -1.275131 |
| C | -0.549011 | -0.4144   | -0.609283 |
| H | -1.622013 | -0.285608 | -0.418959 |
| C | 1.318698  | -1.854733 | -1.119605 |
| H | 1.739966  | -2.841405 | -1.333664 |
| C | -0.077682 | -1.686349 | -0.872188 |
| H | -0.761429 | -2.540132 | -0.888142 |
| C | 0.320854  | 5.678897  | 0.149128  |
| H | -0.751652 | 5.810161  | 0.340522  |
| C | 3.002314  | 5.354686  | -0.32532  |
| H | 4.075316  | 5.225894  | -0.515641 |
| C | 1.134602  | 6.795022  | 0.18498   |
| H | 0.713331  | 7.781696  | 0.399024  |
| C | 2.530982  | 6.626638  | -0.062434 |
| H | 3.214727  | 7.480423  | -0.046493 |

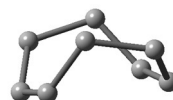**[Rh(trop)(cod)]**

|    |           |           |           |
|----|-----------|-----------|-----------|
| Rh | 0.654429  | -0.176032 | 0.071032  |
| C  | -0.842897 | 1.666316  | -0.531095 |
| C  | -1.056212 | 0.302055  | -1.059763 |
| H  | -0.932575 | 0.259781  | -2.152198 |
| C  | -2.283012 | -0.430772 | -0.606159 |
| C  | -2.275726 | -0.926702 | 0.710428  |
| C  | -0.629958 | 1.819571  | 0.888869  |
| C  | -3.383809 | -0.675447 | -1.431526 |
| H  | -3.382102 | -0.300712 | -2.458765 |
| C  | -0.542668 | 0.644783  | 1.756058  |
| H  | 0.007353  | 0.80525   | 2.689576  |
| C  | -1.098507 | -0.630576 | 1.555161  |
| H  | -0.903418 | -1.349888 | 2.357303  |
| C  | -4.468282 | -1.434902 | -0.963079 |
| H  | -5.310522 | -1.647262 | -1.625109 |
| C  | -0.428443 | 4.056897  | -0.830045 |
| H  | -0.348136 | 4.923807  | -1.489238 |
| C  | -0.713825 | 2.805133  | -1.360721 |
| H  | -0.855044 | 2.683192  | -2.437337 |
| C  | -4.45474  | -1.937674 | 0.339186  |
| H  | -5.287857 | -2.542449 | 0.703525  |
| C  | -0.309125 | 3.10397   | 1.393779  |
| H  | -0.126704 | 3.215258  | 2.465512  |
| C  | -3.360086 | -1.679419 | 1.177638  |
| H  | -3.343629 | -2.078313 | 2.195466  |
| C  | -0.230881 | 4.207572  | 0.555524  |
| H  | -0.002017 | 5.191331  | 0.970167  |
| C  | 1.781246  | -0.70976  | -1.640653 |
| H  | 1.30796   | -0.267584 | -2.525315 |
| C  | 1.134917  | -1.86864  | -1.103525 |
| H  | 0.232329  | -2.214284 | -1.621607 |
| C  | 2.673452  | 0.216559  | 0.887573  |
| H  | 2.558089  | 1.069883  | 1.566251  |

|   |          |           |           |
|---|----------|-----------|-----------|
| C | 2.265182 | -1.037161 | 1.35756   |
| H | 1.831415 | -1.075112 | 2.361902  |
| C | 3.278029 | -0.428398 | -1.512126 |
| H | 3.835499 | -1.377515 | -1.474574 |
| H | 3.625375 | 0.086007  | -2.421248 |
| C | 2.758351 | -2.364165 | 0.803979  |
| H | 2.843321 | -3.08745  | 1.629342  |
| H | 3.774807 | -2.241629 | 0.401203  |
| C | 3.608697 | 0.44799   | -0.284347 |
| H | 4.660811 | 0.297915  | 0.027546  |
| H | 3.528399 | 1.508107  | -0.571152 |
| C | 1.817251 | -2.94014  | -0.278997 |
| H | 2.373042 | -3.638708 | -0.934802 |
| H | 1.030561 | -3.540717 | 0.20481   |

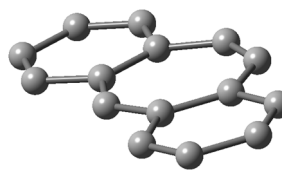

| trop <sup>+</sup> |           |           |           |
|-------------------|-----------|-----------|-----------|
| C                 | 0.000000  | 0.000000  | 1.583107  |
| C                 | 1.627994  | 0.000000  | -0.377101 |
| C                 | -1.627994 | -0.000021 | -0.377101 |
| C                 | -0.687927 | 0.000016  | -1.447194 |
| C                 | 0.687927  | 0.000025  | -1.447194 |
| C                 | 1.296260  | -0.000001 | 1.032743  |
| C                 | -1.296260 | -0.000018 | 1.032743  |
| H                 | -1.145577 | 0.000033  | -2.440206 |
| H                 | 1.145577  | 0.000048  | -2.440206 |
| H                 | 0.000000  | 0.000008  | 2.677839  |
| C                 | 2.364075  | -0.000002 | 1.984078  |
| H                 | 2.108982  | 0.000007  | 3.045133  |
| C                 | 2.999244  | -0.000016 | -0.735881 |
| H                 | 3.258352  | -0.000018 | -1.795774 |
| C                 | 4.003030  | -0.000029 | 0.216291  |
| H                 | 5.047504  | -0.000040 | -0.099081 |
| C                 | 3.684487  | -0.000016 | 1.592103  |
| H                 | 4.479715  | -0.000016 | 2.338017  |
| C                 | -2.999244 | -0.000055 | -0.735881 |
| H                 | -3.258352 | -0.000061 | -1.795774 |
| C                 | -2.364075 | -0.000033 | 1.984078  |
| H                 | -2.108982 | -0.000020 | 3.045133  |
| C                 | -3.684487 | -0.000064 | 1.592103  |
| H                 | -4.479715 | -0.000075 | 2.338017  |
| C                 | -4.003030 | -0.000081 | 0.216291  |
| H                 | -5.047504 | -0.000107 | -0.099081 |

**Table S1.** Selected bond lengths [Å] for the calculated trop mono- and dianions.

| Compound            | M–C5  |
|---------------------|-------|
| Litrop              | 2.210 |
| Natrop              | 2.557 |
| Ktrop               | 2.988 |
| K <sub>2</sub> trop | 2.994 |
| [Rh(trop)(cod)]     | 2.106 |

| Excited state                    | 1                                                                                 | 2                                                                                  | 4                                                                                   |
|----------------------------------|-----------------------------------------------------------------------------------|------------------------------------------------------------------------------------|-------------------------------------------------------------------------------------|
| $\lambda/\text{nm}$              | 933.19                                                                            | 476.11                                                                             | 443.32                                                                              |
| Oscillator strength              | 0.0018                                                                            | 0.0137                                                                             | 0.1511                                                                              |
|                                  | 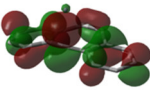 |  |  |
| involved NTOs (iso value = 0.03) | 52 (HOMO)                                                                         | 52 (HOMO)                                                                          | 52 (HOMO)                                                                           |
|                                  |  |  |  |
|                                  | 53 (LUMO)                                                                         | 54 (LUMO+1)                                                                        | 56 (LUMO+3)                                                                         |

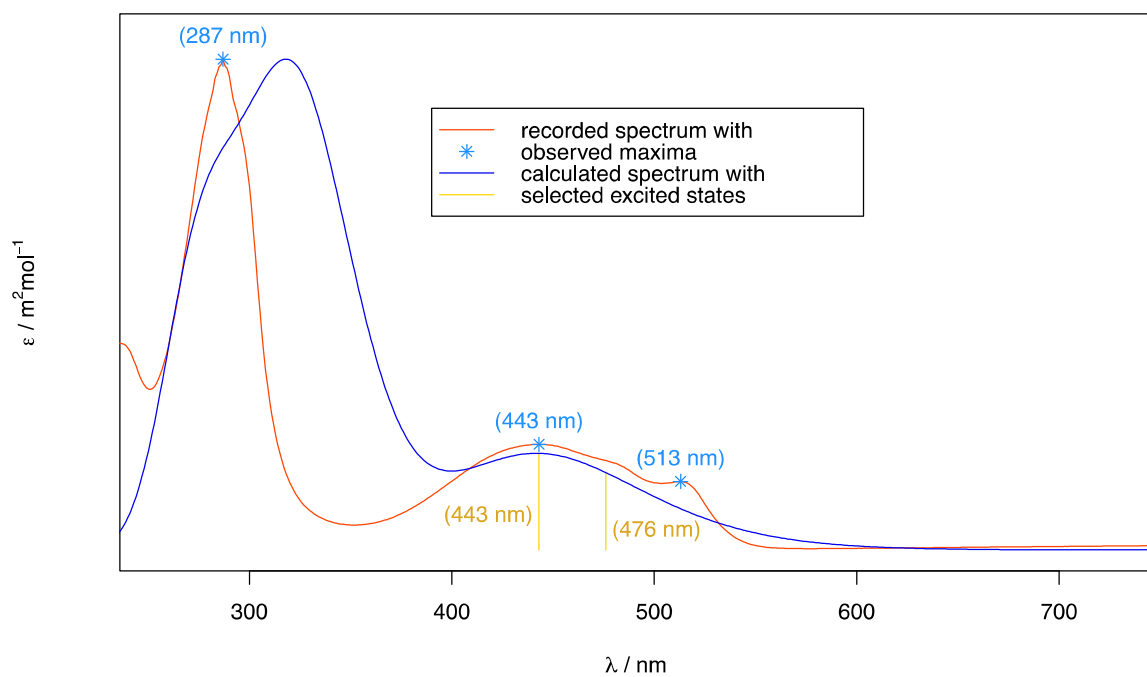

**Figure S1.** Bottom: Recorded (red) *vs.* calculated (blue) spectrum of **Litrop** in THF. The spectra were normalized at their respective maxima. Top: Involved NTOs (natural transition orbitals) at isovalues of 0.03 in the selected excited states.



| Excited state                    | 1                                                                                 | 2                                                                                  | 4                                                                                   |
|----------------------------------|-----------------------------------------------------------------------------------|------------------------------------------------------------------------------------|-------------------------------------------------------------------------------------|
| $\lambda/\text{nm}$              | 1056.98                                                                           | 555.91                                                                             | 460.95                                                                              |
| Oscillator strength              | 0.0027                                                                            | 0.0255                                                                             | 0.1864                                                                              |
|                                  | 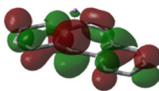 |  |  |
| involved NTOs (iso value = 0.03) | 56 (HOMO)                                                                         | 56 (HOMO)                                                                          | 56 (HOMO)                                                                           |
|                                  |  |  |  |
|                                  | 57 (LUMO)                                                                         | 58 (LUMO+1)                                                                        | 60 (LUMO+3)                                                                         |

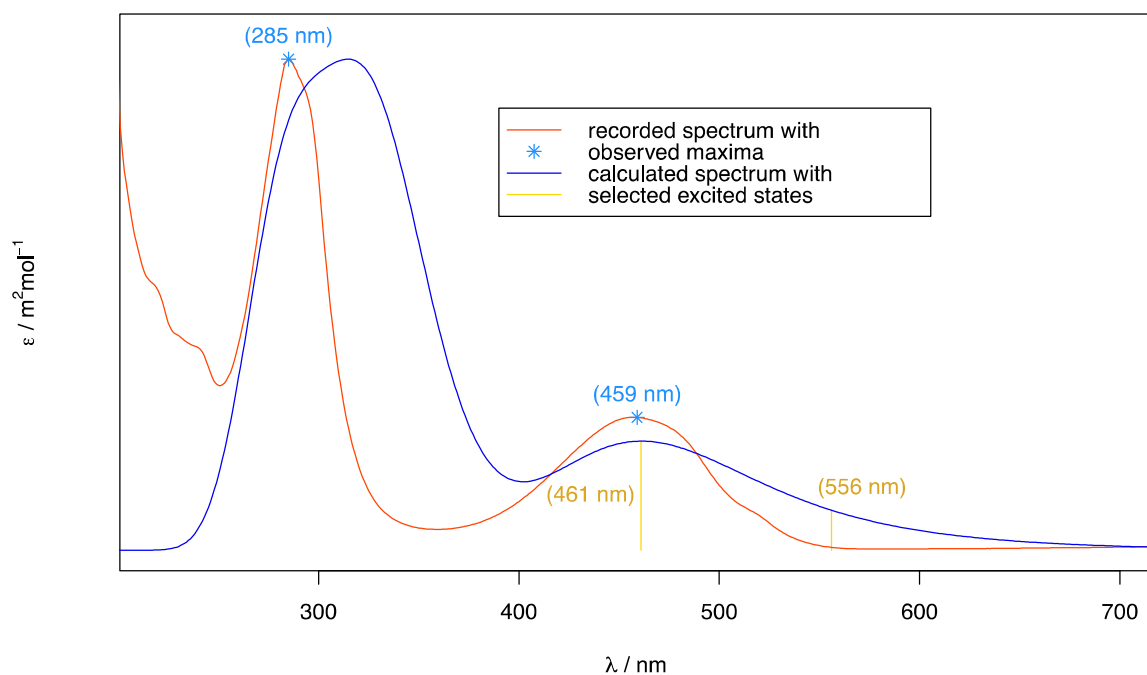

**Figure S2.** Bottom: Recorded (red) *vs.* calculated (blue) spectrum of **Natrop** in THF. The spectra were normalized at their respective maxima. Top: Involved NTOs (natural transition orbitals) at isovalues of 0.03 in the selected excited states.

| Excited state       | 1       | 4      |
|---------------------|---------|--------|
| $\lambda/\text{nm}$ | 1285.89 | 482.89 |
| Oscillator strength | 0.0038  | 0.1957 |

  

|                                  |           |             |
|----------------------------------|-----------|-------------|
| involved NTOs (iso value = 0.03) |           |             |
|                                  | 60 (HOMO) | 60 (HOMO)   |
|                                  |           |             |
|                                  | 61 (LUMO) | 64 (LUMO+3) |

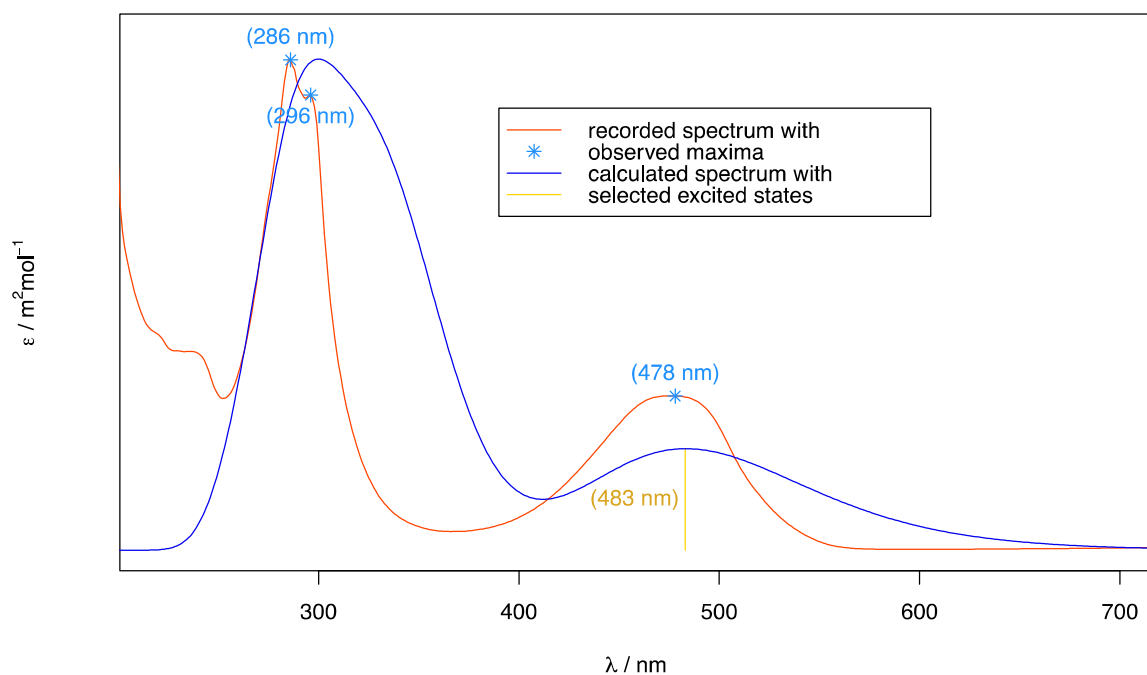

**Figure S3.** Bottom: Recorded (red) *vs.* calculated (blue) spectrum of **Ktrop** in THF. The spectra were normalized at their respective maxima. Top: Involved NTOs (natural transition orbitals) at isovalues of 0.03 in the selected excited states.

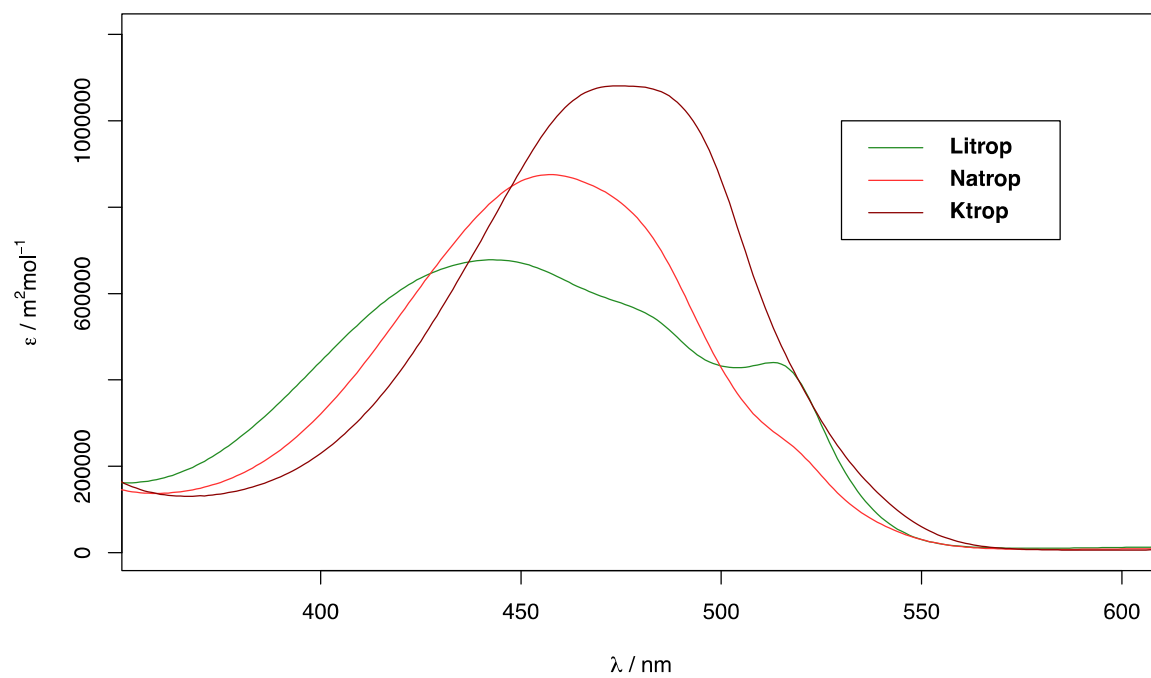

**Figure S4.** Stacked spectra of **Litrop**, **Natrop** and **Ktrop** in THF.

| Excited state       | 3      | 23     |
|---------------------|--------|--------|
| $\lambda/\text{nm}$ | 819.10 | 501.75 |
| Oscillator strength | 0.0116 | 0.1095 |

  

|                                  |              |             |
|----------------------------------|--------------|-------------|
| involved NTOs (iso value = 0.03) |              |             |
|                                  | 70A (SOMO)   | 69 (SOMO-1) |
|                                  |              |             |
|                                  | 72A (LUMO+1) | 73 (LUMO+2) |

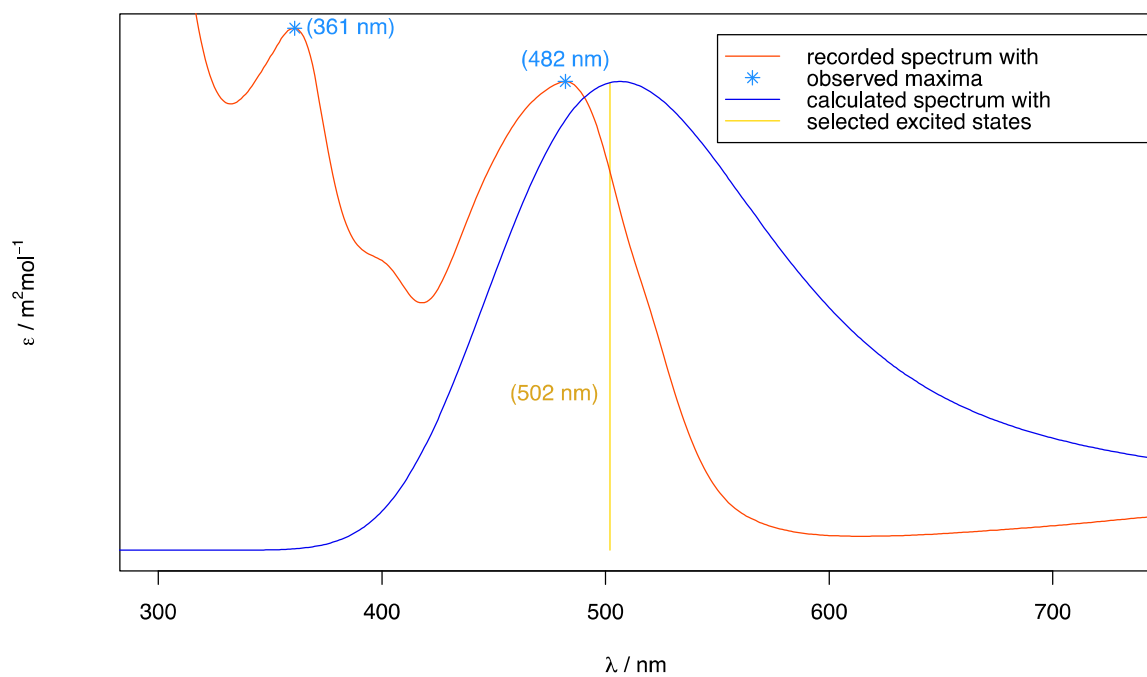

**Figure S5.** Bottom: Recorded (red) *vs.* calculated (blue) spectrum of **Kztrop** in THF. The recorded and the calculated spectra were normalized at 482 nm and at its maximum, respectively. Top: Involved NTOs (natural transition orbitals) at isovalues of 0.03 in the selected excited states.

| Excited state       | 1                                                                                 | 2                                                                                 | 22                                                                                 | 26                                                                                  |
|---------------------|-----------------------------------------------------------------------------------|-----------------------------------------------------------------------------------|------------------------------------------------------------------------------------|-------------------------------------------------------------------------------------|
| $\lambda/\text{nm}$ | 638.60                                                                            | 608.63                                                                            | 336.19                                                                             | 319.12                                                                              |
| Oscillator strength | 0.0000                                                                            | 0.0162                                                                            | 1.3465                                                                             | 0.4045                                                                              |
|                     | 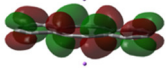 |  |  |  |
| involved NTOs       | 65 (HOMO)                                                                         | 65 (HOMO)                                                                         | 64 (HOMO-1)                                                                        | 64 (HOMO-1)                                                                         |
|                     |  |  |  |  |
|                     | 66 (LUMO)                                                                         | 67 (LUMO+1)                                                                       | 69 (LUMO+3)                                                                        | 72 (LUMO+6)                                                                         |

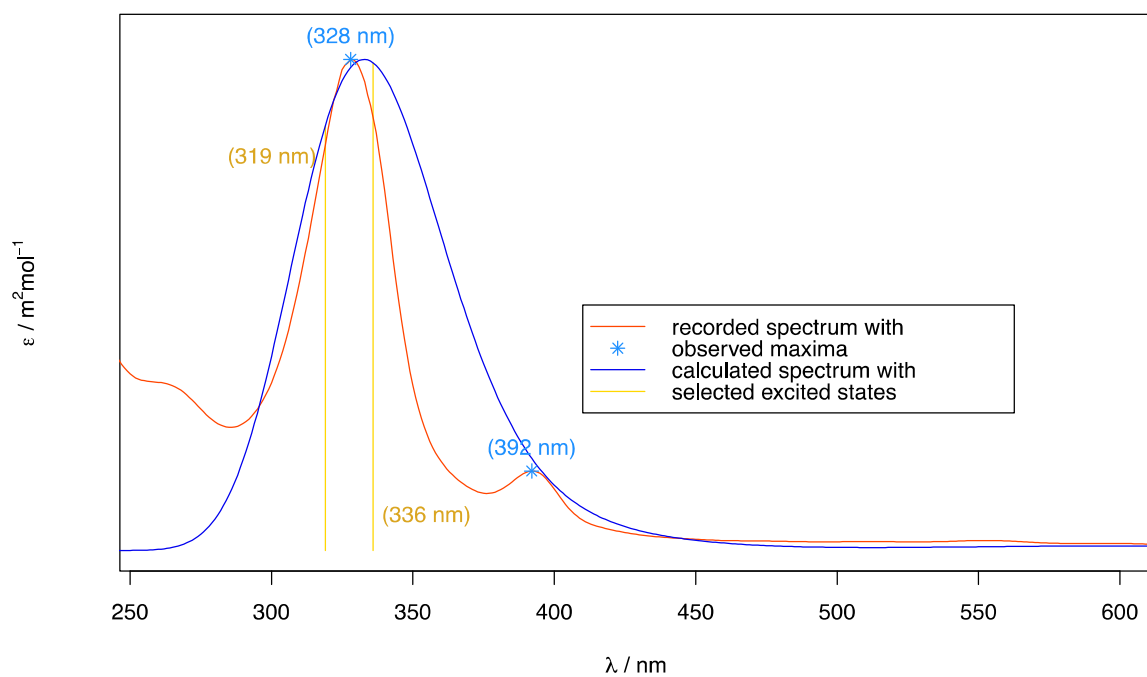

**Figure S6.** Recorded (red) *vs.* calculated (blue) spectrum of Nazdbcot in THF. The spectra were normalized at their respective maxima. Top: Involved NTOs (natural transition orbitals) at isovalues of 0.03 in the selected excited states.

| Excited state                    | 1                                                                                 | 2                                                                                  | 25                                                                                  |
|----------------------------------|-----------------------------------------------------------------------------------|------------------------------------------------------------------------------------|-------------------------------------------------------------------------------------|
| $\lambda/\text{nm}$              | 610.26                                                                            | 357.72                                                                             | 334.07                                                                              |
| Oscillator strength              | 0.0133                                                                            | 0.1657                                                                             | 1.4731                                                                              |
|                                  | 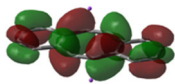 |  |  |
| involved NTOs (iso value = 0.03) | 73 (HOMO)                                                                         | 73 (HOMO)                                                                          | 73 (HOMO)                                                                           |
|                                  |  |  |  |
|                                  | 74 (LUMO)                                                                         | 90 (LUMO+16)                                                                       | 93 (LUMO+19)                                                                        |

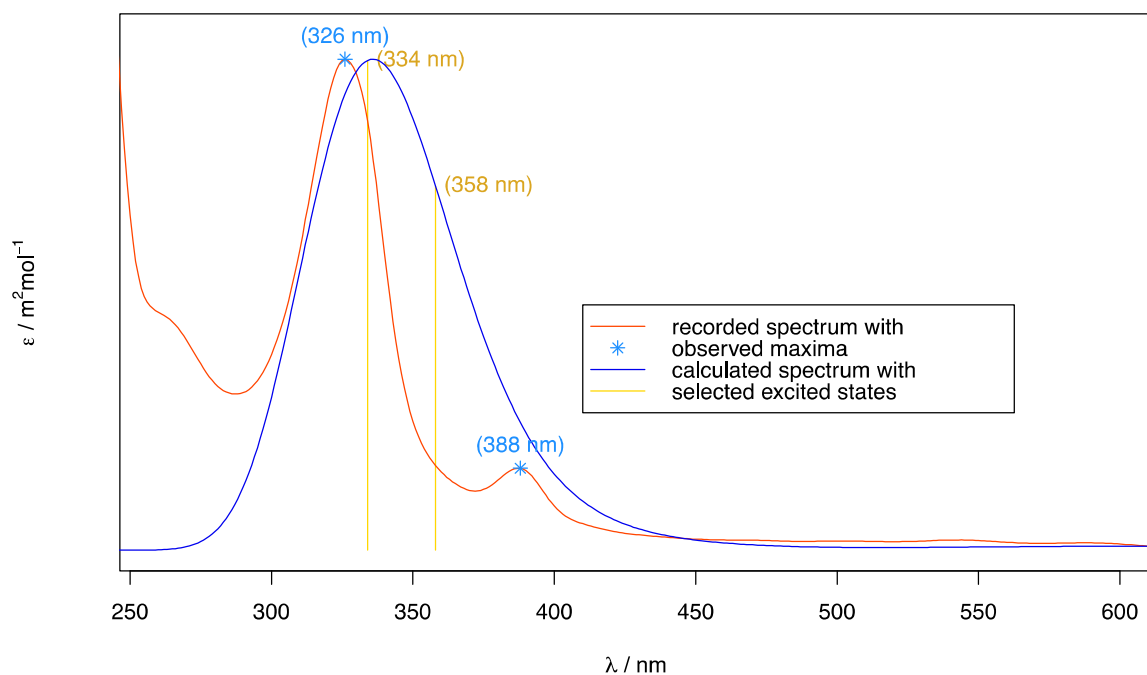

**Figure S7.** Recorded (red) *vs.* calculated (blue) spectrum of **K<sub>2</sub>dbcot** in THF. The recorded and the calculated spectra were normalized at 326 nm and at its maximum, respectively. Top: Involved NTOs (natural transition orbitals) at isovalues of 0.03 in the selected excited states.

## 2. Electrochemical data for Ktrop and trop<sub>2</sub> on GC electrode.

**Procedures:** All cyclic voltammetry (CV) experiments are performed under strictly anaerobic environments in a conventional three electrode single-compartment cell with a SP 300 Bio-Logic potentiostat (Bio-Logic Science Instruments SAS). A standard Ag/AgNO<sub>3</sub> (10 mM) electrode is used as the reference electrode. The reference electrode is calibrated with internal Fc/Fc<sup>+</sup> oxidation potential. The average standard potential of Fc/Fc<sup>+</sup> redox couple is determined to be 0.287 V and hence is used as correction factor in conversion to Fc/Fc<sup>+</sup> reference. Glassy carbon electrodes (GCEs, from BASi) with 3 mm diameter is used as working electrode. Electrodes were polished on wet polishing cloths using a 1 μm diamond suspension and a 0.05 μm alumina slurry. The scan rate was 100 mVs<sup>-1</sup>. Dry THF was used as solvent and recrystallized TBAPF<sub>6</sub> is used for all electrochemical experiments. In general case 1 mM concentration of catalyst is used if not noted otherwise. In all the data 2<sup>nd</sup> scan of three successive scans is presented.

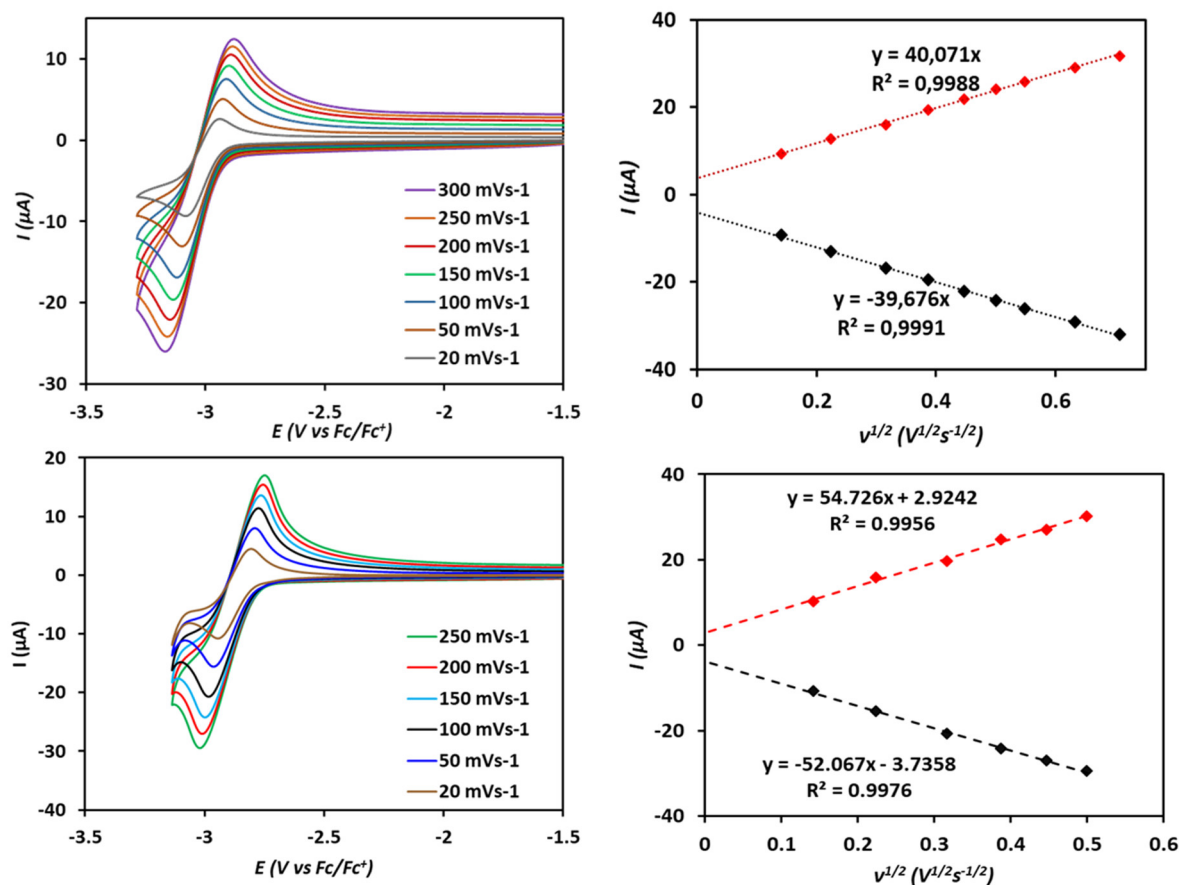

**Figure S8.** Scan rate dependence of the 1<sup>st</sup> reduction process for Ktrop (top) and trop<sub>2</sub> (bottom) in 0.1 M TBAPF<sub>6</sub> solution in THF on glassy carbon electrode. The CV responses are given in left and corresponding Randles-Sevcik plots are given on the right.

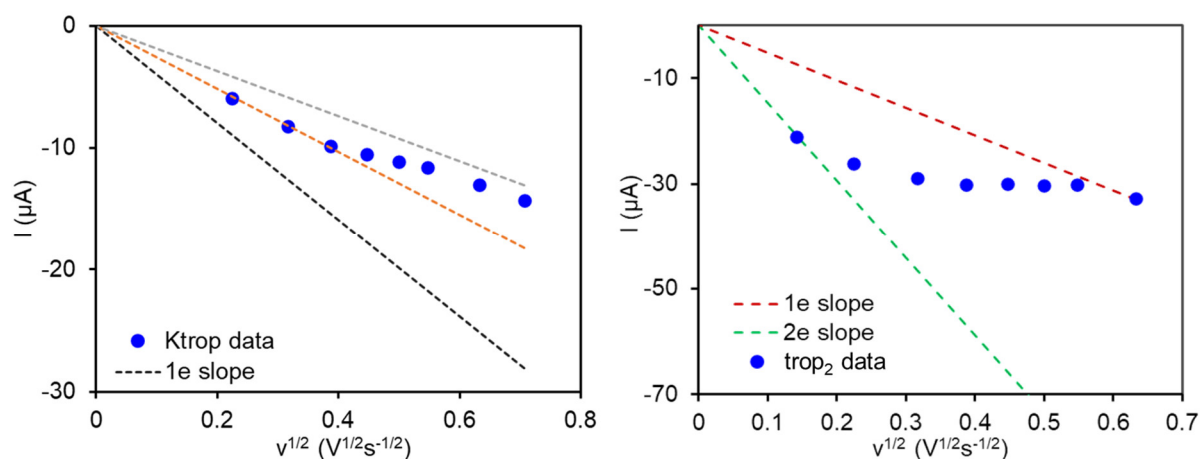

**Figure S9.** Overlay of the  $I_p$  currents (blue dots) *vs.* scan rate $^{1/2}$  plot of **Ktrop** $^{2-/3-}$  redox process with theoretical 1e $^-$  and 2e $^-$  plot slope (*left*). The similar plot for **trop** $_2^{1-/2-}$  is presented on the *right*.

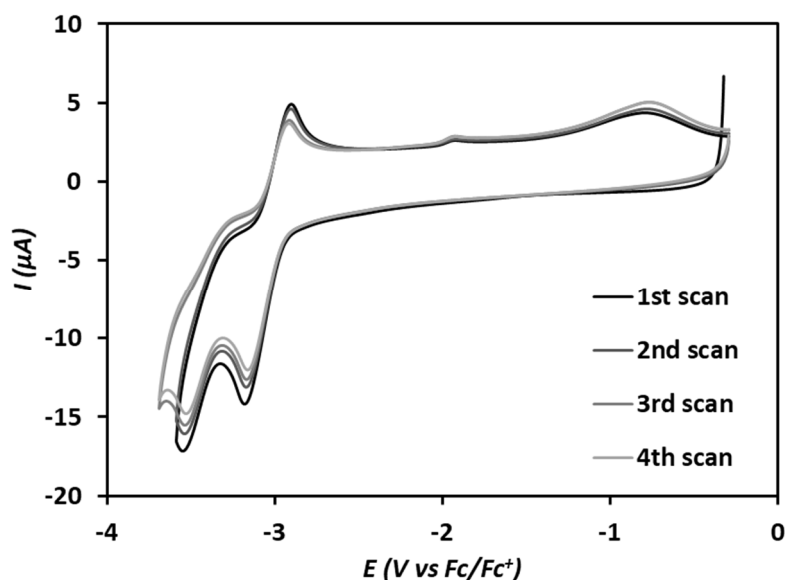

**Figure S10.** Overlay of the successive CV scans for 1 mM of **Ktrop** solution in THF (0.1 M TBAPF<sub>6</sub>) at 100 mVs $^{-1}$ .

Determination of the number of electrons associated to the redox events [5]

The number of electrons exchanged during the reduction of **trop** $_2$  at  $E_{1/2} = -2.86$  V *vs.* Fc/Fc $^+$  was determined by the combination of a chronoamperometry experiment and a study of the stationary regime obtained at a carbon microelectrode. Solutions of **trop** $_2$  and ferrocene (10 mM in THF with 0.1 M TBAPF<sub>6</sub>) were prepared. A chronoamperometry study was carried out on both solutions using exactly identical experimental conditions (with glassy carbon as working electrode with 3 mm diameter, platinum wire counter electrode and Ag/AgNO<sub>3</sub> reference electrode that is converted to Fc/Fc $^+$ ). The plot of the current  $I$  versus  $t^{1/2}$  (cf. Figure S11) obey the Cottrell equation [6]:

$$I = kt^{1/2} \text{ with } k = nFACD^{1/2}(\pi)^{-1/2} \quad (1)$$

where  $I$  is the current,  $n$  the number of electrons,  $F$  the Faraday constant,  $A$  is the electroactive area of the electrode,  $D$  the diffusion coefficient of the species,  $C$  the concentration of the compound and  $t$  the time. As the concentration of the ferrocene solution is equal to the one of the **trop** $_2$ , and as the number of electrons involved in the oxidation of ferrocene is 1, the ratio of the director coefficient  $k$  of the plot measured for the ferrocene and the **trop** $_2$  solutions is:



$$k_{\text{trop2}}/k_{\text{Fc}} = n(D_{\text{trop2}}/D_{\text{Fc}})^{1/2} \quad (2)$$

where  $D_{\text{Fc}}$  is the diffusion coefficient for ferrocene,  $D_{\text{trop2}}$  is the diffusion coefficient for **trop2** and  $n$  is the number of electrons involved in its reduction.

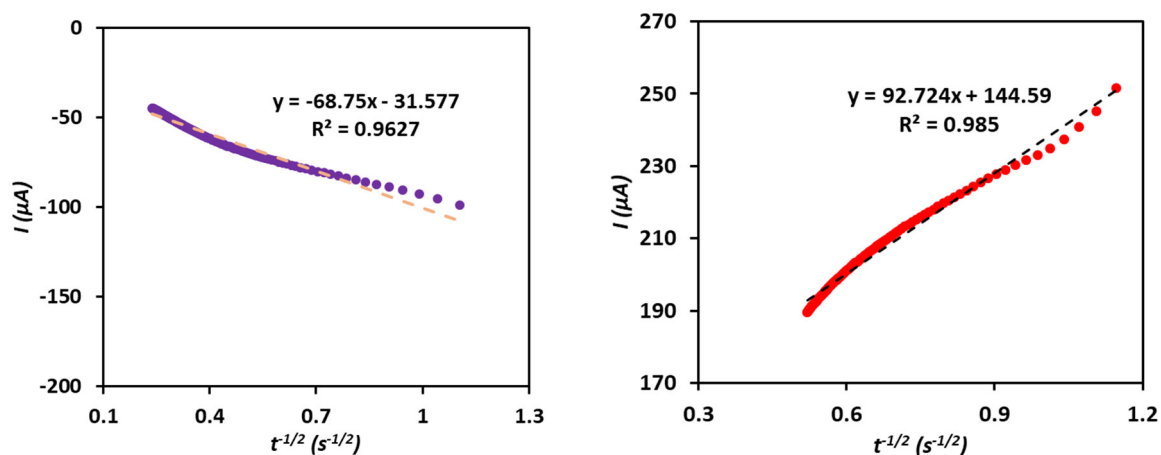

**Figure S11.**  $I$  vs.  $t^{-1/2}$  plot of the chronoamperometry data obtained from a 10 mM **trop2** (in purple, left) solution at  $-3.07$  V vs.  $\text{Fc}/\text{Fc}^+$  and a 10 mM ferrocene solution (in red, right) at  $0.23$  V vs.  $\text{Fc}/\text{Fc}^+$  in 0.1 M  $\text{TBAPF}_6$  in THF. In parallel, the intensity of the current at a microelectrode in stationary regime was measured for both solutions (cf. Figure S12). The following relation gives the value of the limiting current:

$$i^{\text{lim}} = 4nFrCD \quad (3)$$

Where  $i$  is the current,  $n$  the number of electrons,  $F$  the Faraday constant,  $D$  the diffusion coefficient of the species,  $r$  the radius of the carbon microelectrode and  $C$  the concentration of the compound in the bulk solution.

Similarly, the ratio of the limit intensities measured for the ferrocene and **trop2** solution is:

$$i^{\text{lim}}_{\text{trop2}}/i^{\text{lim}}_{\text{Fc}} = nD_{\text{trop2}}/D_{\text{Fc}} \quad (4)$$

where  $D_{\text{Fc}}$  is the diffusion coefficient for ferrocene,  $D_{\text{trop2}}$  is the diffusion coefficient for **trop2** and  $n$  is

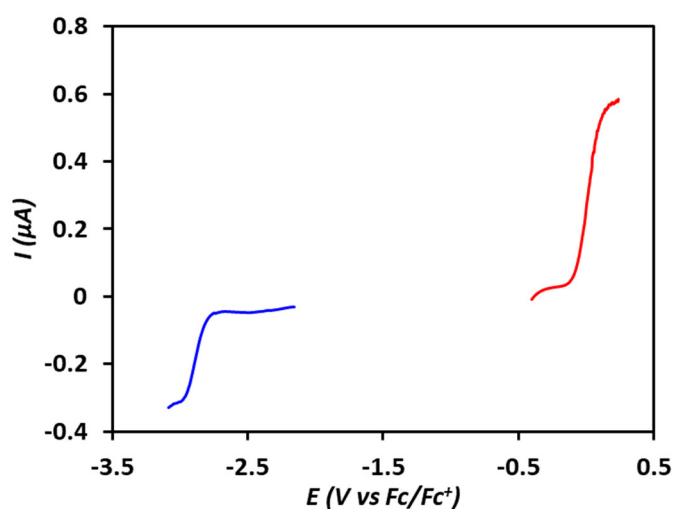

the number of electrons involved in its reduction at  $E_{1/2} = -2.27$  V vs.  $\text{Fc}/\text{Fc}^+$ .

**Figure S12.** Overlay of linear sweep voltammograms of a 10 mM **trop2** solution (blue) and a 10 mM ferrocene (red) in a 0.1 M  $\text{TBAPF}_6$  solution in THF obtained in stationary regime at a carbon microelectrode ( $5 \text{ mVs}^{-1}$  scan rate).

The number of electrons exchanged during the reduction of **trop<sub>2</sub>** is then given by:

$$n = (k_{\text{Cpx}}/k_{\text{Fc}})^2 / (i_{\text{limCpx}}/i_{\text{limFc}}). \quad (5)$$

**Table S2.** Key parameters for the determination of the number of electrons.

| $k_{\text{trop}_2}$ ( $\mu\text{A}\cdot\text{s}^{1/2}$ ) | $k_{\text{Fc}}$ ( $\mu\text{A}\cdot\text{s}^{1/2}$ ) | $i_{\text{lim}_{\text{trop}_2}}$ ( $\mu\text{A}$ ) | $i_{\text{lim}_{\text{Fc}}}$ ( $\mu\text{A}$ ) | $n$         |
|----------------------------------------------------------|------------------------------------------------------|----------------------------------------------------|------------------------------------------------|-------------|
| 68.75                                                    | 92.724                                               | 0.267                                              | 0.525                                          | <b>1.08</b> |

From our electrochemical data (cf. **Error! Reference source not found.**), we find  $n = 1.08$ . Accordingly, the process observed by electrochemistry for the reduction of **trop<sub>2</sub>** at  $E_{1/2} = -2.86$  V vs. Fc/Fc<sup>+</sup> involves a transfer of **1 electron**.

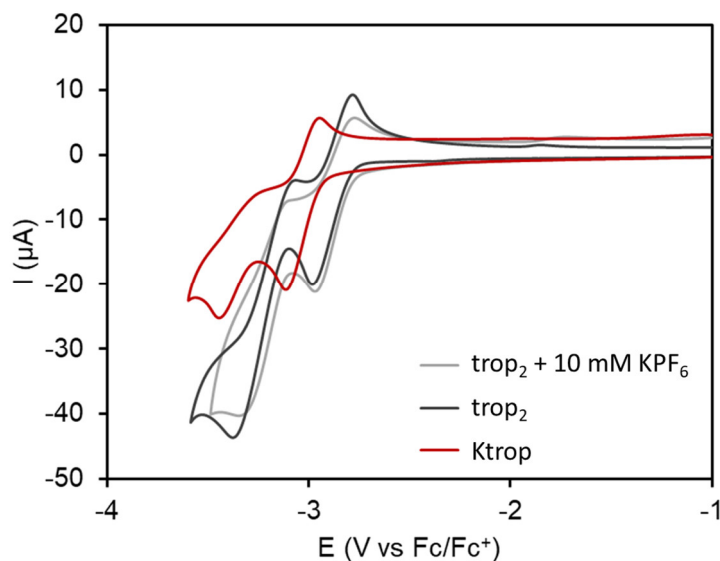

**Figure S13.** Overlay of the CVs recorded for **Ktrop** (red), **trop<sub>2</sub>** (black) and **trop<sub>2</sub>** in presence of 10 mM KPF<sub>6</sub> (grey).

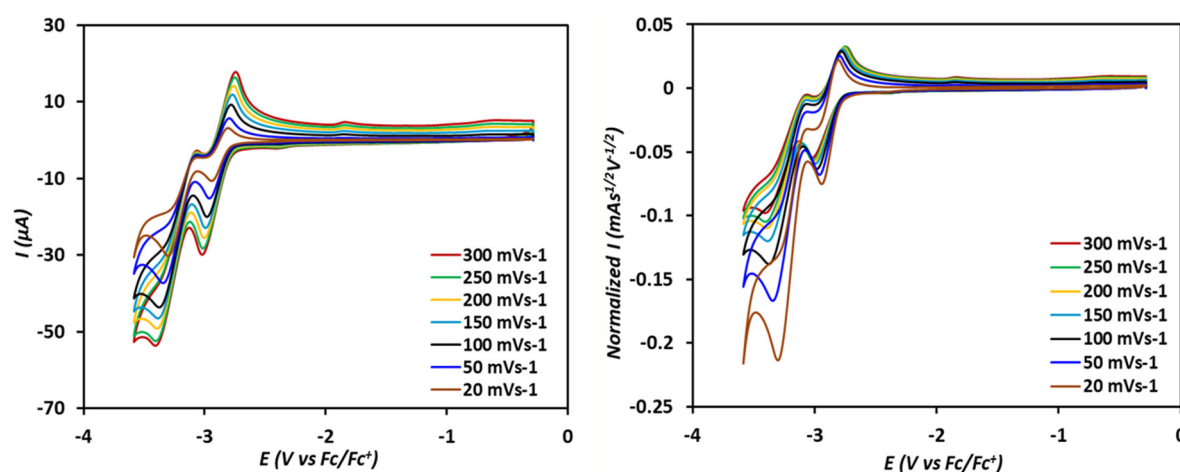

**Figure S14.** Left: Overlay of the cyclic voltammograms at various scan rates with 1 mM **trop<sub>2</sub>** in 0.1 M TBAPF<sub>6</sub> solution in THF on glassy carbon electrode. Right: Corresponding normalized current plot where the normalization is performed with respect to scan rates.

### 3. Reactivity studies

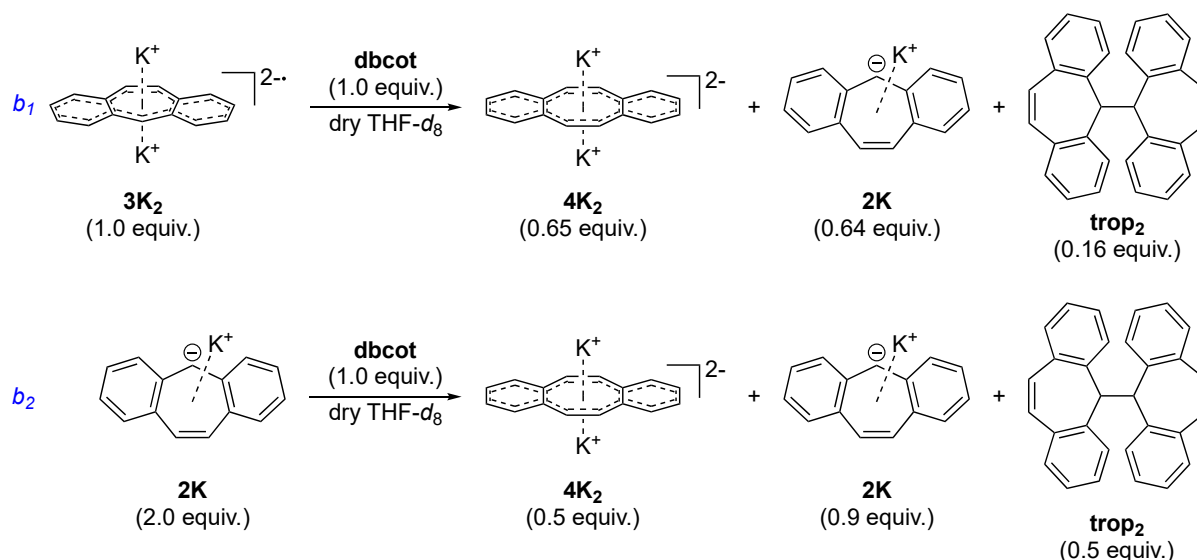

**Scheme S1: Further interconversion reactions between the trop and the dbcot scaffold.**

## References

1. Frisch, M. J.; Trucks, G. W.; Schlegel, H. B.; Scuseria, G. E.; Robb, M. A.; Cheeseman, J. R.; Scalmani, G.; Barone, V.; Petersson, G. A.; Nakatsuji, H.; Li, X.; et al. *Gaussian 09 Rev. D.01*, Wallingford, CT, 2013.
2. Perdew, J. P.; Burke, K.; Ernzerhof, M., Generalized Gradient Approximation Made Simple. *Phys. Rev. Lett.* **1997**, *78*, 1396-1396.
3. Perdew, J. P.; Burke, K.; Ernzerhof, M., Generalized Gradient Approximation Made Simple. *Phys. Rev. Lett.* **1996**, *77*, 3865-3868.
4. Krishnan, R.; Binkley, J. S.; Seeger, R.; Pople, J. A., Self-consistent molecular orbital methods. XX. A basis set for correlated wave functions. *J. Chem. Phys.* **1980**, *72*, 650-654.
5. Camp, C.; Guidal, V.; Biswas, B.; Pécaut, J.; Dubois, L.; Mazzanti, M., Multielectron redox chemistry of lanthanide Schiff-base complexes. *Chem. Sci.* **2012**, *3*, 2433-2448.
6. Bard, A. J.; Faulkner, L. R., *Electrochemical Methods: Fundamentals and Applications*. John Wiley: New York, 2001.

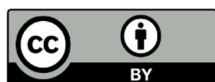

© 2020 by the authors. Licensee MDPI, Basel, Switzerland. This article is an open access article distributed under the terms and conditions of the Creative Commons Attribution (CC BY) license (<http://creativecommons.org/licenses/by/4.0/>).
